# Supplementary material for: Radiation pharmacogenomics: A genome-wide association approach to identify radiation response biomarkers using human lymphoblastoid cell lines
Source: HighWire-hosted journal article supplement (doi:10.1101/gr.107672.110), 2010-10-05

**Supplementary Figure 1. Linkage disequilibrium analysis for 6 top SNPs on chromosome 8, locus “8C”, in AA and CA subjects.**

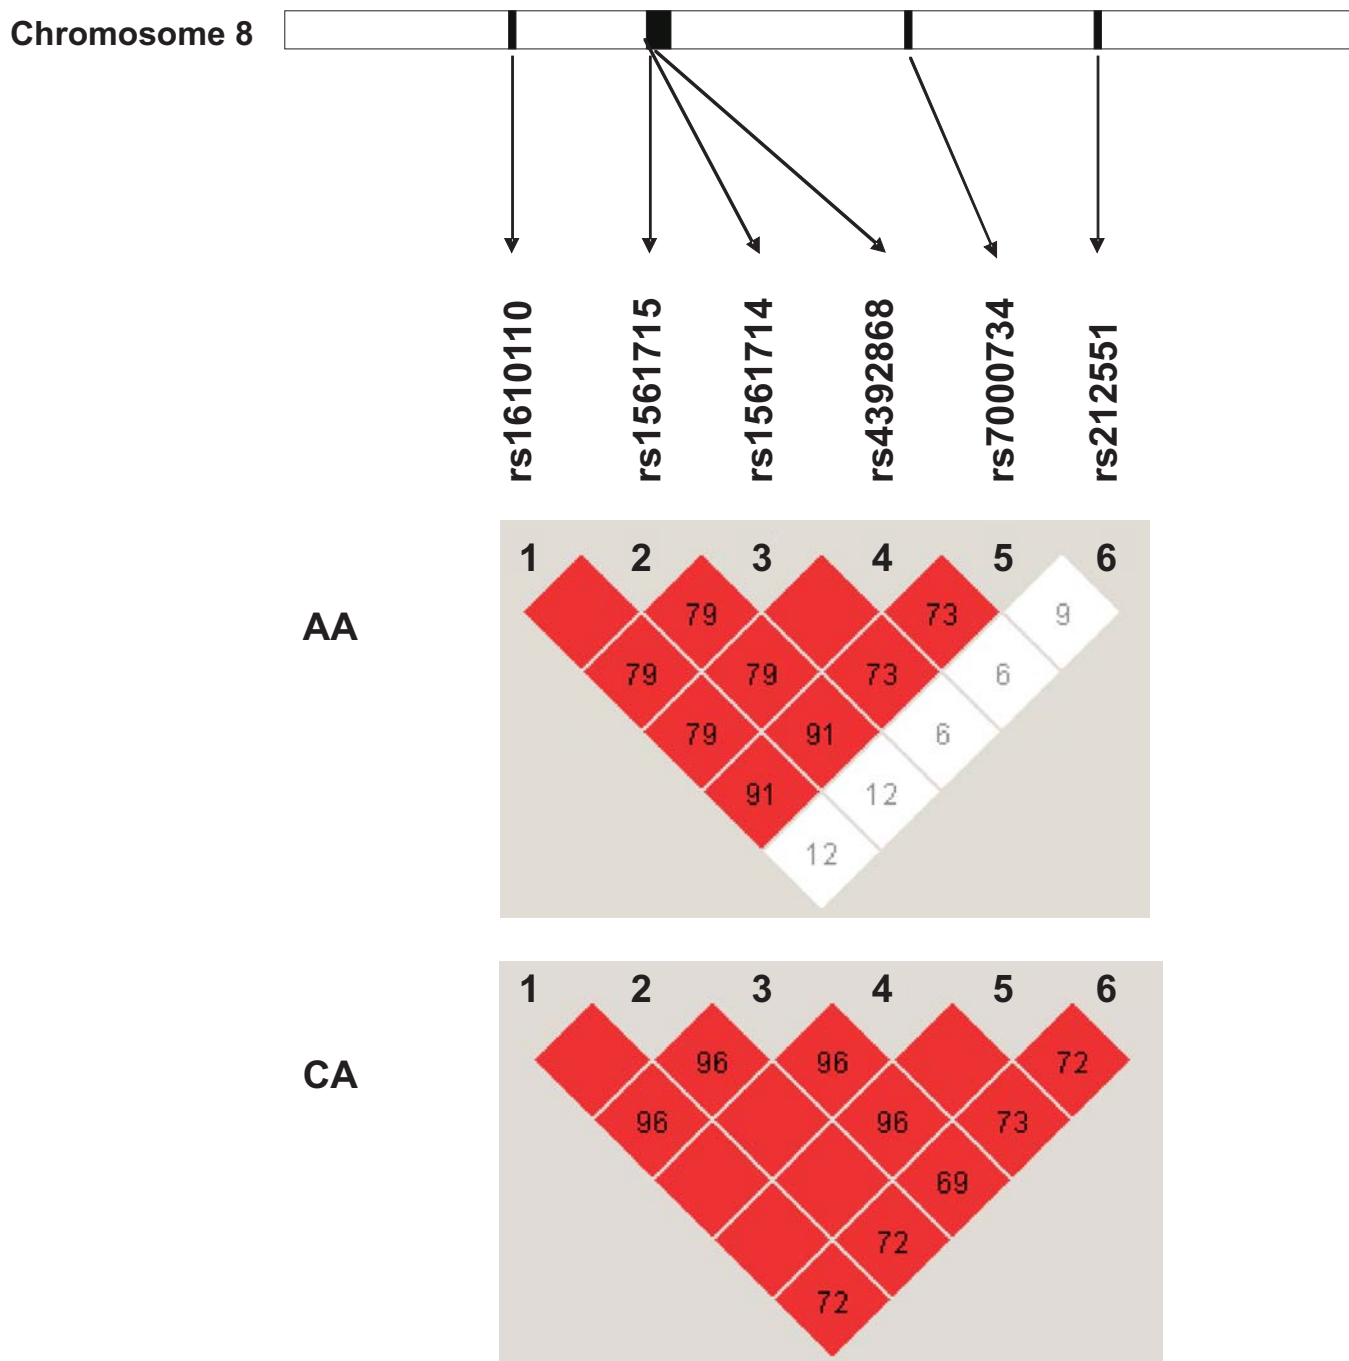

# Supplementary Figure 2. Ingenuity Pathway Analyses

A total of 240 candidate genes, including 211 genes from either expressoin vs AUC correlations (p value  $<10^{-3}$ ) or from “integrated analyses” (SNP vs Expression p value  $<10^{-4}$ , and Expression vs AUC p value  $<10^{-3}$ ), and 29 genes from 27 “loci” that were associated with radiation AUC, with each locus containing at least 2 SNPs within 50kb with p values  $<10^{-4}$ , were used in the network analyses.

(A) Network 1

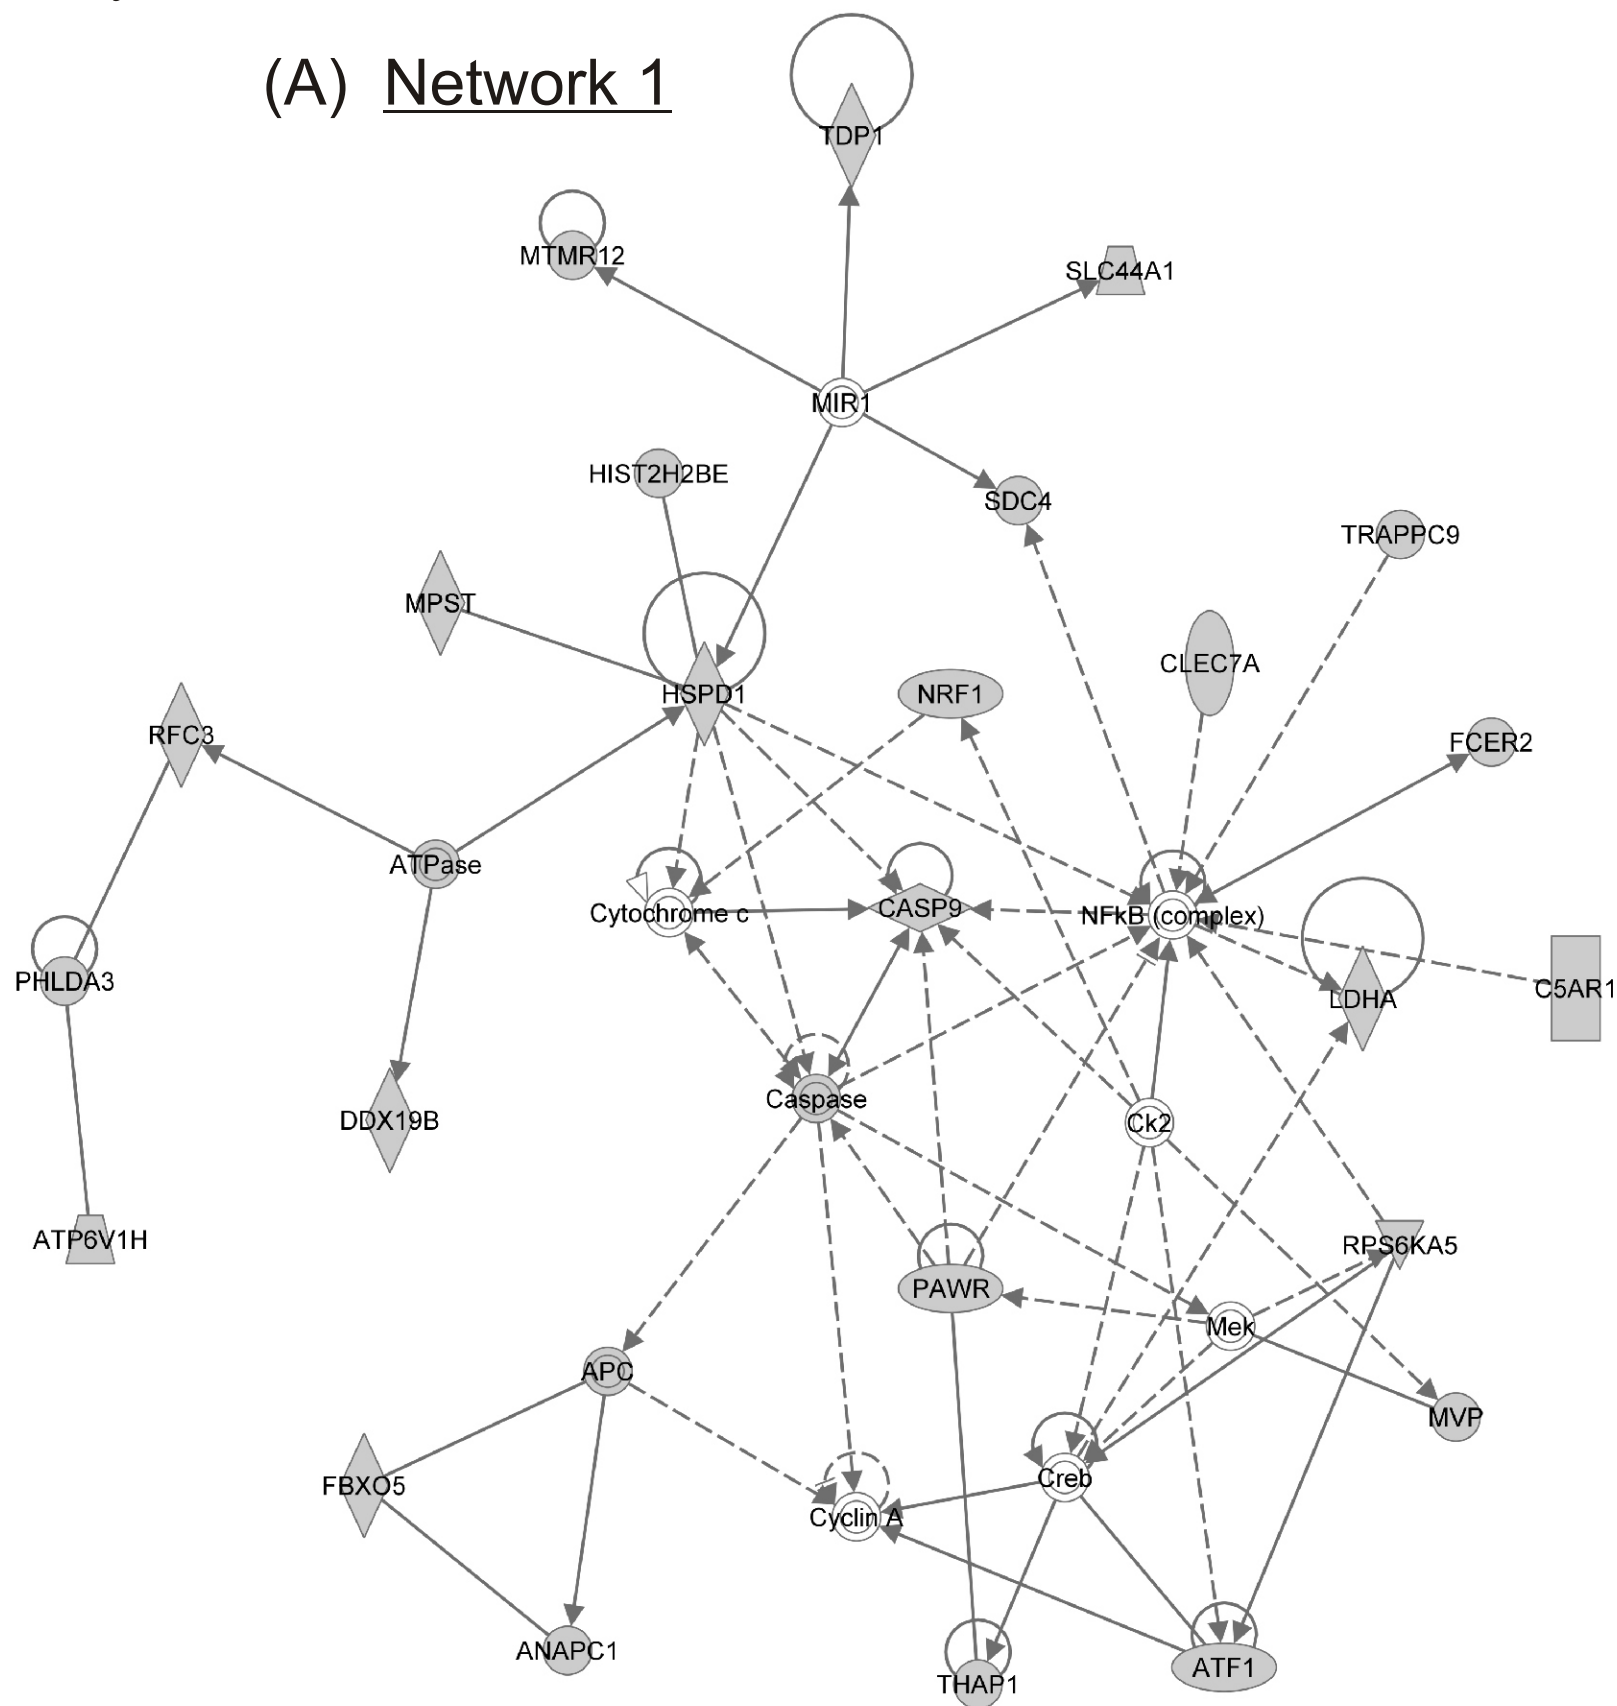

(B) Network 2

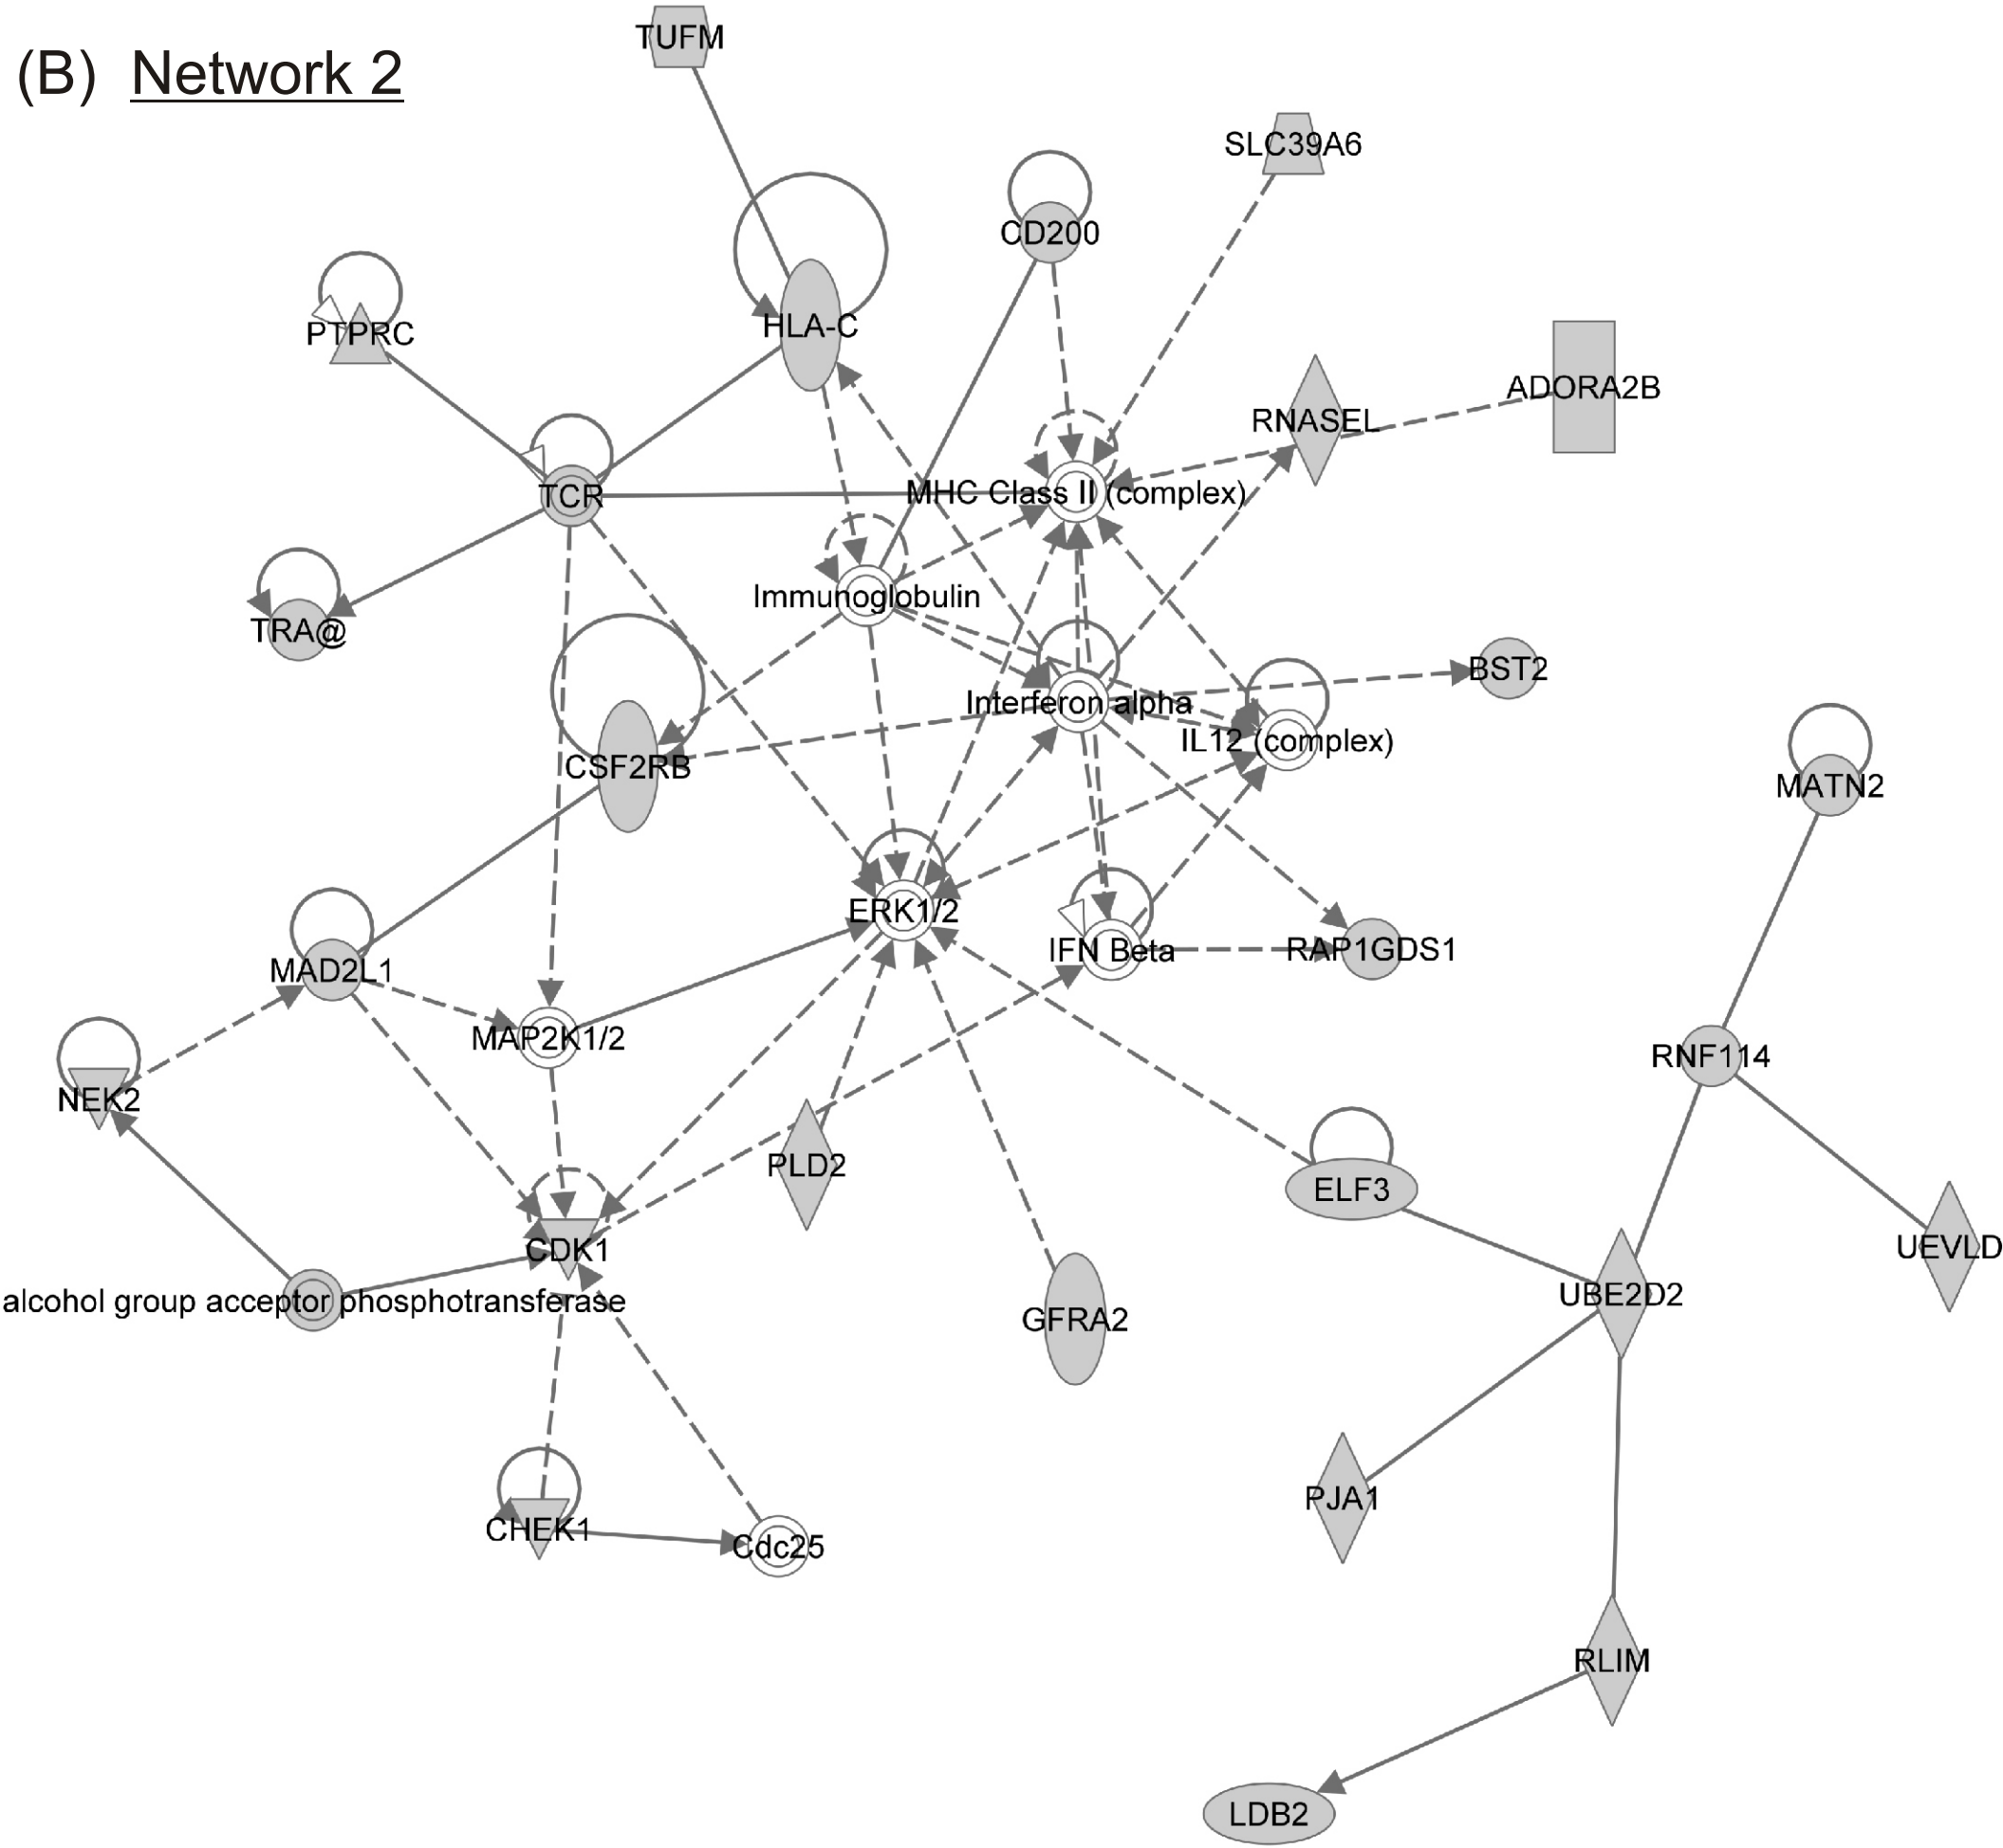

(C) Network 3

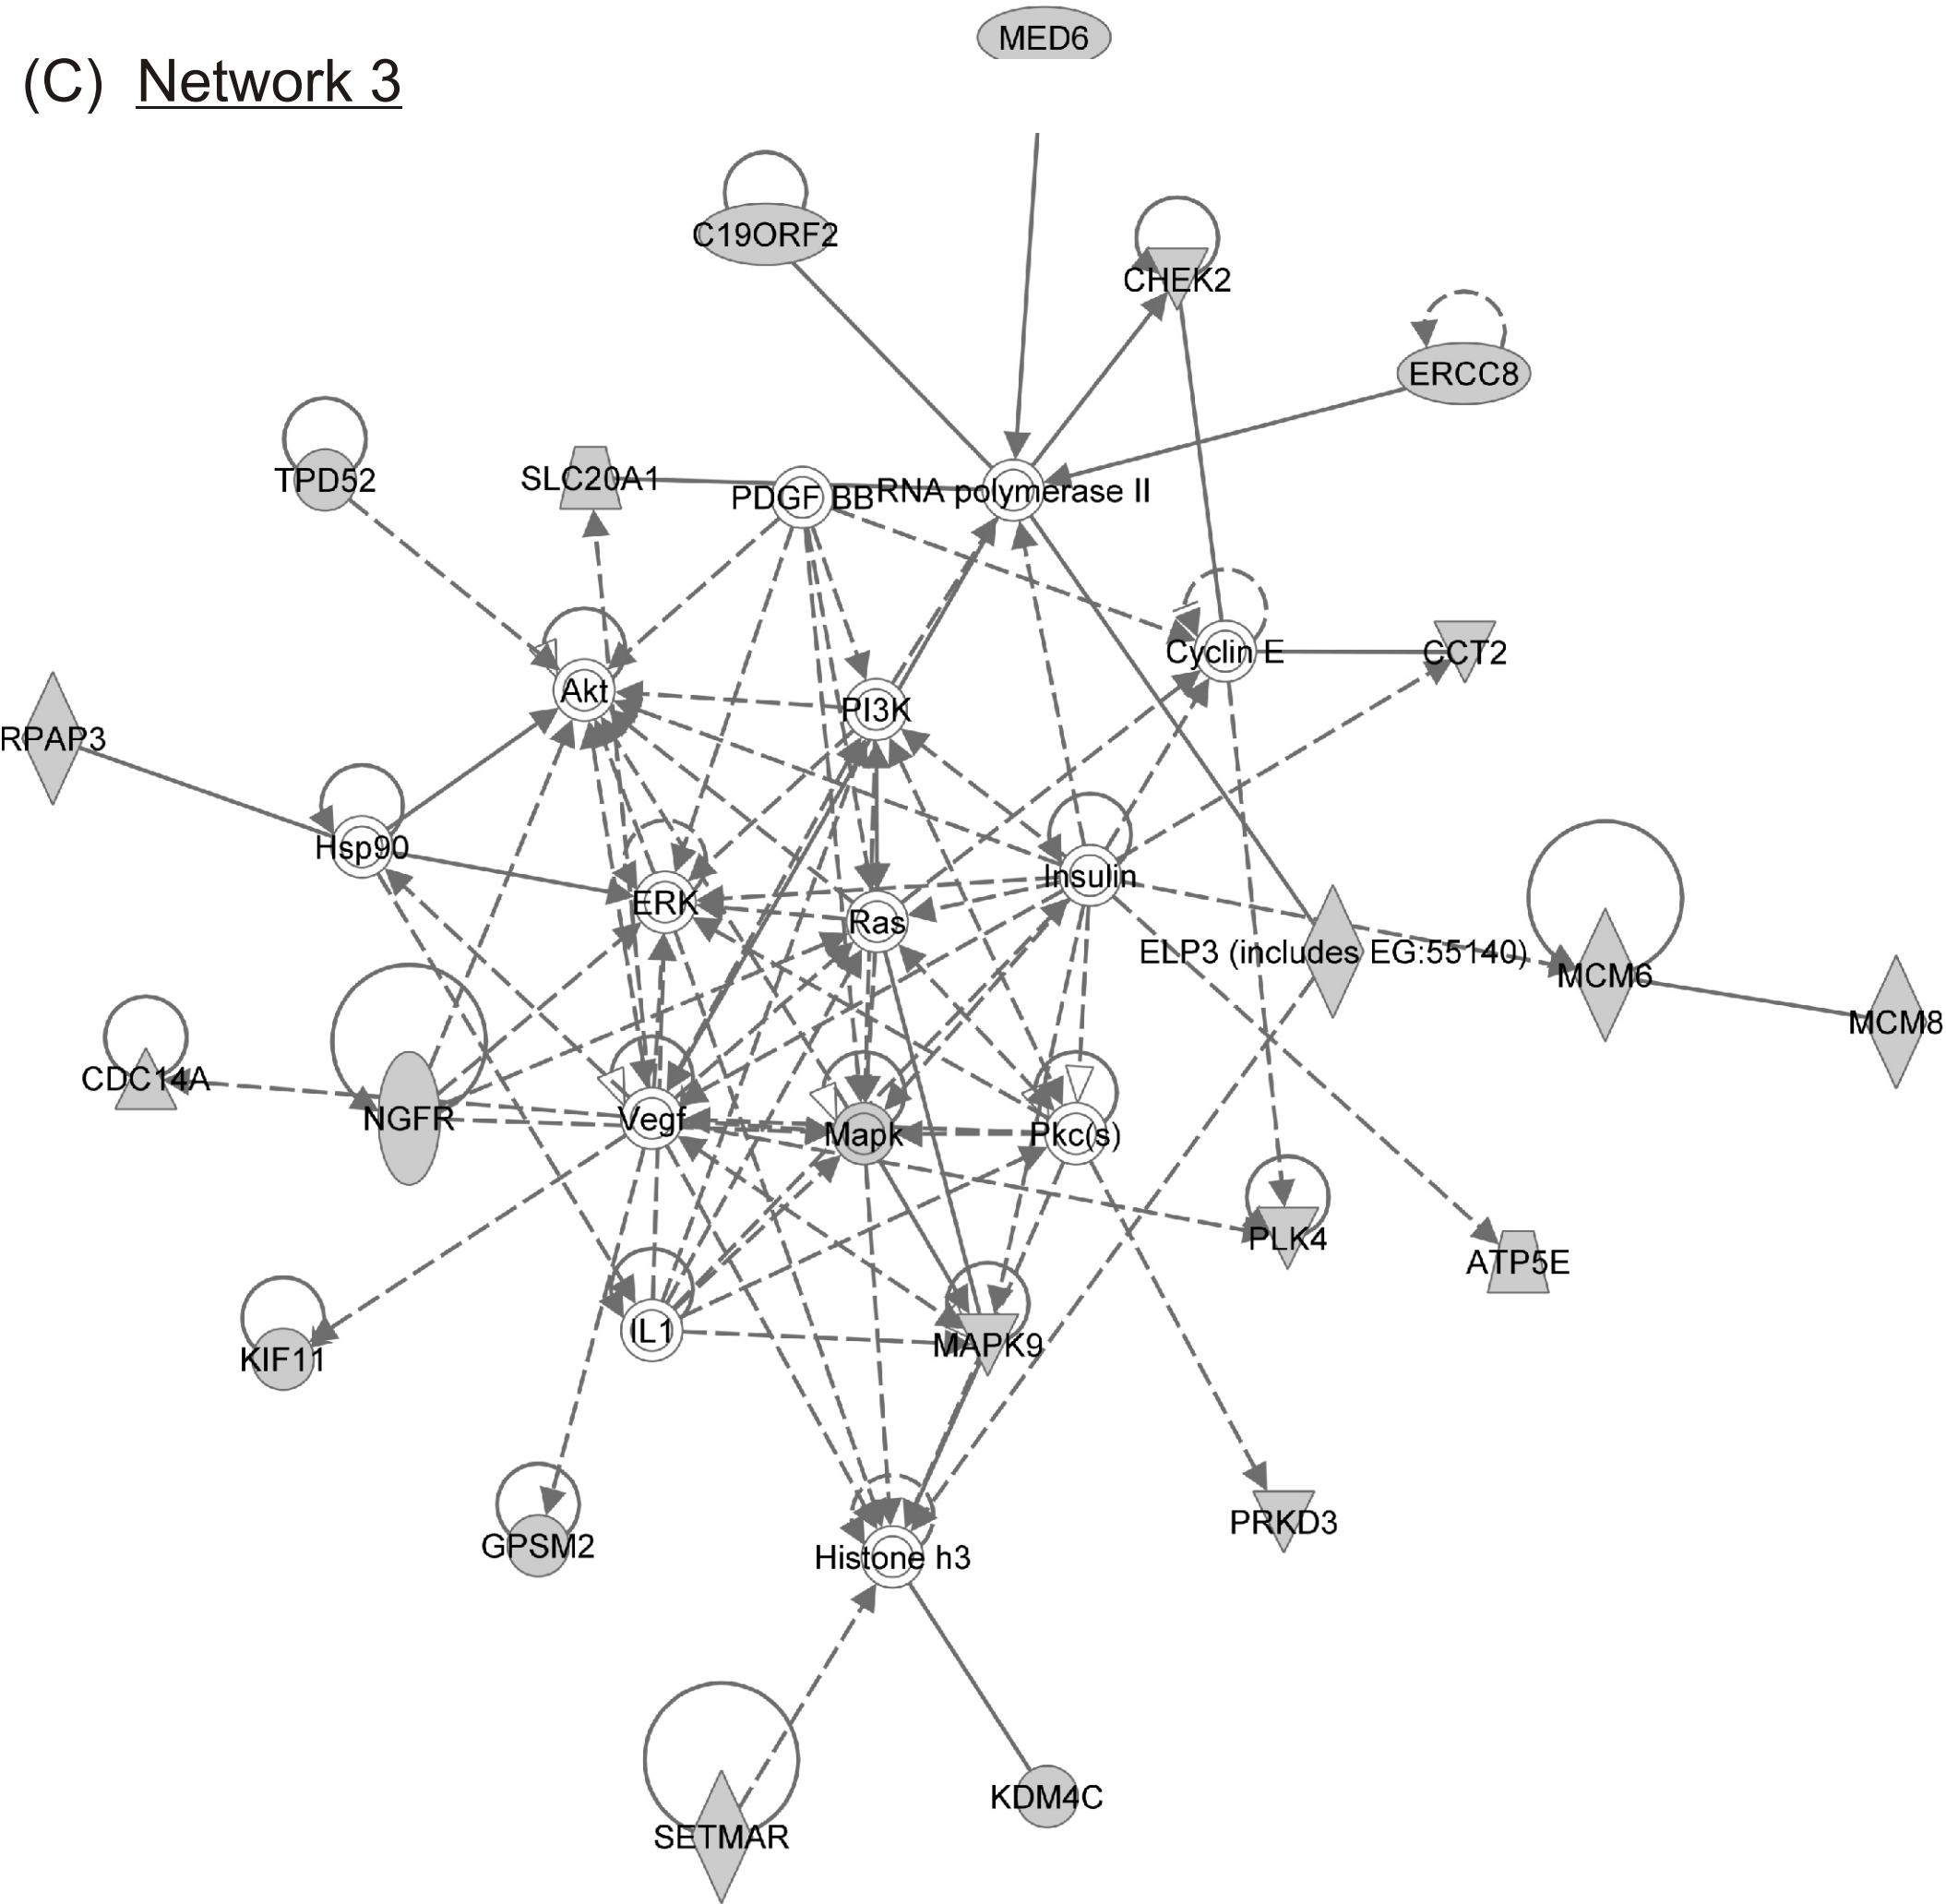

(B) Network 2

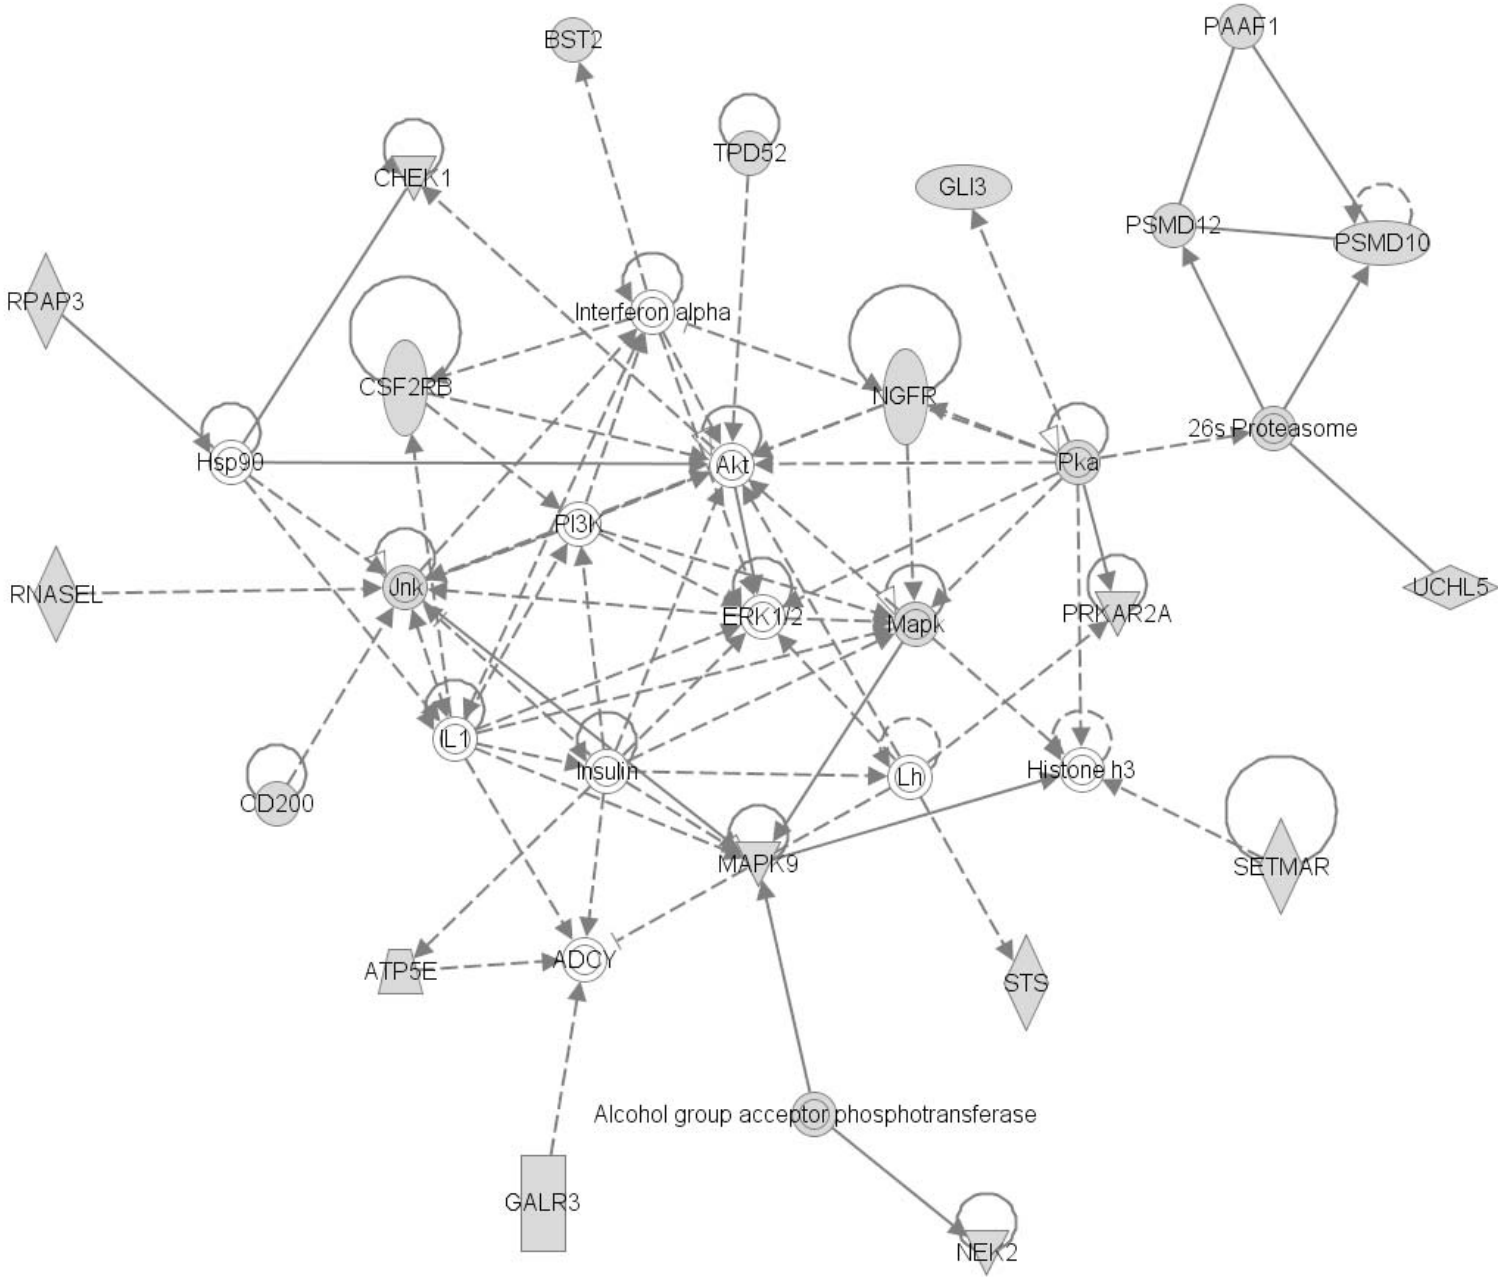



(C) Network 3

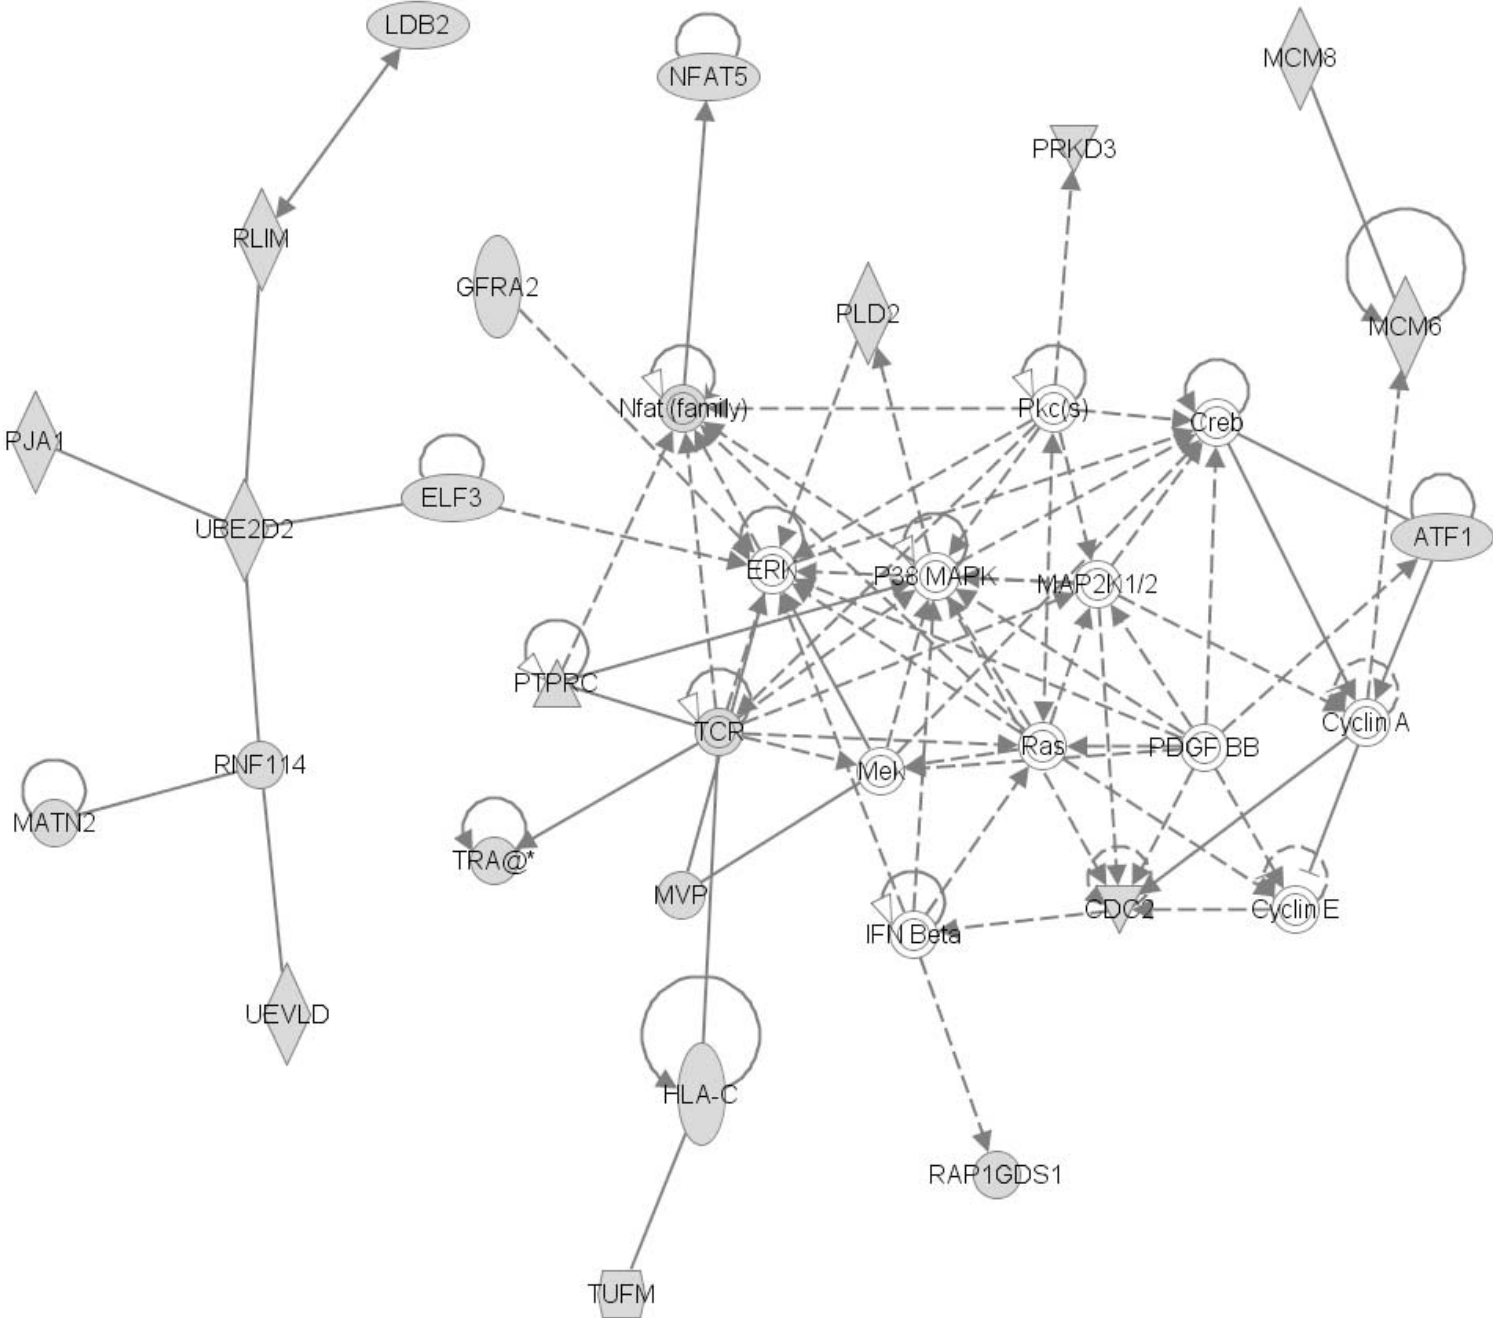

Supplement: Suppl_Figures.pdf [file Suppl_Figures.pdf]
